# Supplementary material
Source: PubMed Central journal article supplement (PMC6731442)
Supplement: ajtr0011-4817-f7.pdf [file ajtr0011-4817-f7.pdf]

## Interdependency of gut microbiota and serum lipid profiles in patients with TCSCI

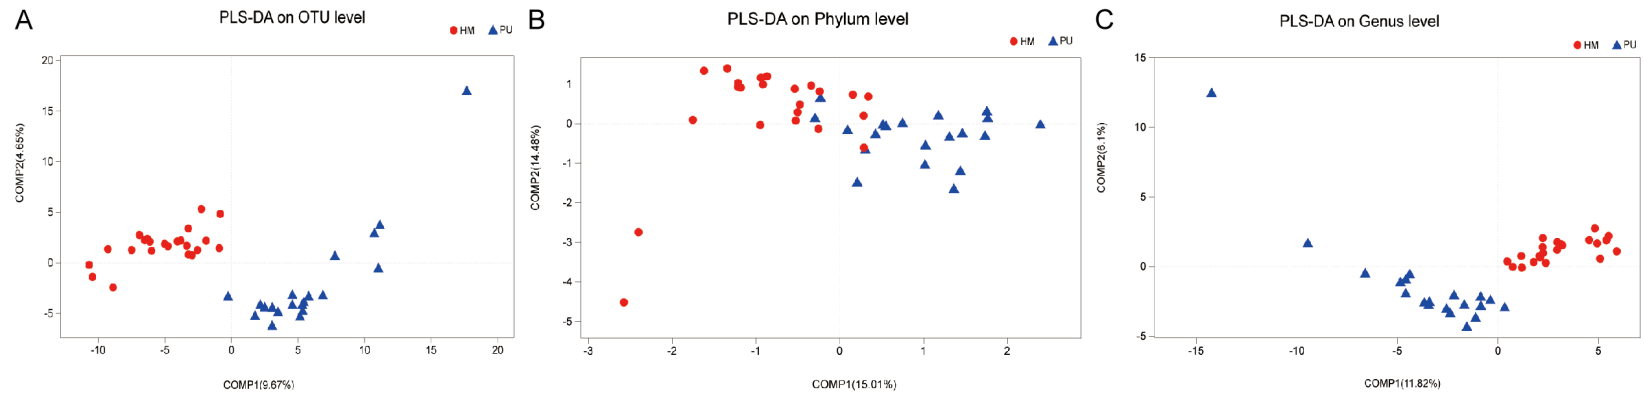

**Supplementary File 1.** The dispersion of the sample point distribution in the PLS-DA analysis revealed that there were significant differences in bacterial community composition between health males and cervical SCI groups on OTUs, phylum and genus level.

**Supplementary File 2.** VIF of selected environmental factors by the functions of `envfit` (`permu = 999`) and `vif.cca` among the health males and cervical SCI groups.

**Supplementary File 3.** Correlation heatmap analysis chart of different environmental factors on the community composition of health males and cervical SCI groups in phylum and genus levels (correlation).

**Supplementary File 4.** Correlation heatmap analysis chart of different environmental factors on the community composition of health males and cervical SCI groups in phylum and genus levels (*P* value).
